# Supplementary material
Source: Research Square preprint supplement (doi:10.21203/rs.3.rs-9936764/v1)
Supplement: Supplementary file 1 [file 1775ccf648febfacd17f8e64.docx]

**Gambling‑Related Harms and Emerging Gambling Formats Among Youth: A Cross‑Sectional Study in Swedish Upper Secondary Schools**

Wall, H., Nilsson, A., Jayaram Lindström, N, Hammarberg, A, Magnusson, K, Månsson, V

Supplementary Material

# **Supplement Table 1**. Sample descriptives by gender.

| **Variable** | **Overall** N = 722*1* | **Female** n = 270*1* | **Male** n = 449*1* |
| --- | --- | --- | --- |
| **Type of school program** |  |  |  |
| Vocational program | 232 (32%) | 59 (22%) | 172 (39%) |
| University-prep program | 483 (67%) | 209 (78%) | 272 (61%) |
| Other | 2 (0.3%) | 0 (0%) | 2 (0.4%) |
| **Sports-focused program** | 439 (61%) | 151 (56%) | 288 (64%) |
| **Living situation** |  |  |  |
| Live with guardian(s) | 474 (66%) | 201 (74%) | 270 (60%) |
| Live with partner | 35 (4.8%) | 13 (4.8%) | 22 (4.9%) |
| Live alone | 106 (15%) | 27 (10%) | 79 (18%) |
| Live with someone other than guardians | 107 (15%) | 29 (11%) | 78 (17%) |
| *1*n (%). *Note: 3 responded “Neither” in gender category* | | | |

# **Supplementary Table 2.** Gambling formats during the previous 12 months by gender, sorted from most to least common.

| **Gambling format** | **Overall** N = 722 | **Female** n = 270 | **Male** n = 449 |
| --- | --- | --- | --- |
| Has gambled the previous 12 months (any) | 59.2% | 47.0% | 66.9% |
| Bingo | 34.8% | 39.8% | 32.0% |
| Lotteries / number games | 22.7% | 22.2% | 23.1% |
| Online sports betting | 19.7% | 3.0% | 29.9% |
| Online slots | 16.3% | 3.0% | 24.5% |
| Online casino | 15.9% | 3.0% | 23.8% |
| Gambling with other stakes than money (e.g., skins and crypto) | 14.1% | 1.5% | 21.8% |
| Lottery-like gaming | 12.3% | 1.5% | 18.8% |
| Trading (e.g., stocks) | 12.3% | 2.3% | 18.4% |
| Online poker | 10.8% | 0.8% | 17.0% |
| Cryptocurrency gambling | 8.5% | 1.1% | 12.9% |
| eSports betting | 8.2% | 1.1% | 12.5% |
| Other | 6.9% | 4.5% | 8.4% |
| Land-based casino (restaurant) | 4.6% | 1.1% | 6.8% |
| Land-based sports betting | 4.2% | 1.1% | 6.1% |
| Horse race betting | 4.2% | 4.1% | 4.3% |
| *Note: 3 responded “Neither” in gender category* |  |  |  |

#

# **Supplementary Table 3.** Reported harms by gender.

| **Harms reported (GHS-10)** | **All student reported gambling,**  n = 420*1* | **Female** n = 125*1* | **Male** n = 295*1* |
| --- | --- | --- | --- |
| Any harm | 20.0% | 8.8% | 24.7% |
| Reduction of my available spending money | 13.1% | 7.0% | 15.4% |
| Less spending on recreational expenses | 9.7% | 6.0% | 11.0% |
| Reduction of my savings | 11.0% | 7.0% | 12.5% |
| Sold personal items | 5.6% | 5.0% | 5.9% |
| Increased credit card debt | 3.5% | 5.0% | 2.9% |
| Had regrets that made me feel sorry about my gambling | 11.3% | 6.0% | 13.2% |
| Felt like a failure | 7.5% | 4.0% | 8.8% |
| Felt ashamed of my gambling | 5.1% | 5.0% | 5.1% |
| Felt distressed about my gambling | 7.8% | 4.0% | 9.2% |
| Spent less time with people I care about | 5.4% | 5.0% | 5.5% |
| *1*n (%); % | | | |

# **Supplementary Table 4.** Frequency of casino stream watching and associated harms by gender

| **Characteristic** | **Never** N = 584*1* | **Monthly** N = 94*1* | **Weekly_or_more** N = 33*1* |
| --- | --- | --- | --- |
| Male |  |  |  |
| Female | 265 (45%) | 3 (3.2%) | 2 (6.1%) |
| Male | 319 (55%) | 91 (97%) | 31 (94%) |
| Any Gambling Harm (IGH-10 ≥1) | 43 (7.4%) | 24 (26%) | 17 (52%) |

*1*n (%); Mean (SD)
